# Supplementary material for: CircFOXO3 rs12196996, a polymorphism at the gene flanking intron, is associated with circFOXO3 levels and the risk of coronary artery disease
Source: publisher site journal article supplement (doi:10.18632/aging.103398), 2020-07-02
Supplement: Supplementary file [file aging-v12i13-103398-supplementary-material-SD1.pdf]

## SUPPLEMENTARY FIGURE

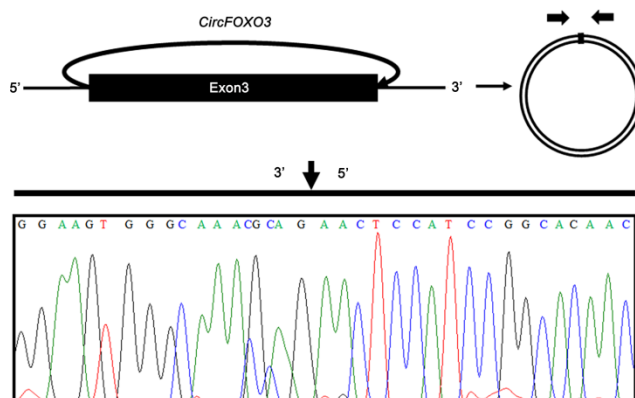

**Supplementary Figure 1. Schematic representation of formation of the circFOXO3 through a back-splicing event at exon 3.** The curved arrow joins the 5' splice site to the 3' splice site of exon 3. On the right, a schematic representation of circFOXO3 is depicted; arrows indicate the divergent primer couple used to detect circFOXO3. Below the scheme, direct-sequencing electropherogram shows the head-to-tail splice junction, indicated by a black arrow, located between the 3' and 5' splice sites of exon 3.
